# Supplementary material for: Spatial Factors Outperform Local Environmental and Geo-Climatic Variables in Structuring Multiple Facets of Stream Macroinvertebrates’ β-Diversity
Source: MDPI journal article supplement (doi:10.3390/ani12192648), 2022-10-02
Supplement: s1 [file s1]

**Table S1.** Summary of local environmental (Local), geo-climatic (Geo) and spatial (Spatial) variables with their codes and descriptions in this study.

| Variables    |       |                                      |        |       |         |
|--------------|-------|--------------------------------------|--------|-------|---------|
| Code         | Unit  | Description                          | Mean   | Min   | Max     |
| <b>Local</b> |       | <b>Local environmental variables</b> |        |       |         |
| pH           | -     | pH                                   | 8.55   | 6.73  | 10.12   |
| DO           | mg/L  | Dissolved oxygen                     | 9.18   | 0.01  | 15.63   |
| Cond         | µs/cm | Conductivity                         | 249.62 | 3.90  | 1124.00 |
| SS           | mg/L  | Suspended solid                      | 37.36  | 1.00  | 1110.00 |
| TDS          | mg/L  | Total dissolved solid                | 201.65 | 14.95 | 903.00  |
| COD          | mg/L  | Chemical oxygen demand               | 14.78  | 0.00  | 84.65   |
| WT           | °C    | Water temperature                    | 16.29  | 7.20  | 26.00   |
| CODMn        | mg/L  | Permanganate index of COD            | 5.02   | 0.00  | 45.30   |
| NH3-N        | mg/L  | Ammonia nitrogen                     | 1.05   | 0.00  | 14.50   |
| NO2-N        | mg/L  | Nitrite nitrogen                     | 0.15   | 0.00  | 2.23    |
| PO4-P        | mg/L  | Soluble reactive phosphorus          | 0.07   | 0.00  | 0.93    |
| TN           | mg/L  | Total Nitrogen                       | 6.30   | 0.48  | 22.60   |
| TP           | mg/L  | Total Phosphorus                     | 0.17   | 0.00  | 2.55    |
| NPR          | -     | TN/TP                                | 382.43 | 0.00  | 3986.00 |
| Width        | m     | Width                                | 48.78  | 1.50  | 420.00  |
| Velocity     | m/s   | Velocity                             | 0.47   | 0.00  | 1.14    |
| Depth        | cm    | Water depth                          | 25.96  | 6.33  | 130.00  |
| QHEI         | -     | Habitat score                        | 112.38 | 51.00 | 185.00  |
| <b>Geo</b>   |       | <b>Geo-climatic variables</b>        |        |       |         |
| Forest       | %     | Forest%                              | 67.35  | 5.00  | 100.00  |
| Shrubs       | %     | Shrubs%                              | 1.81   | 0.00  | 8.00    |
| Herbaceous   | %     | Herbaceous vegetation%               | 0.34   | 0.00  | 6.00    |
| Agriculture  | %     | Cultivated and managed vegetation%   | 24.17  | 0.00  | 88.00   |
| Urban        | %     | Urban/built-up%                      | 0.97   | 0.00  | 17.00   |
| Snow/ice     | %     | Snow/ice%                            | 0.36   | 0.00  | 20.00   |
| Barrenlands  | %     | Barren lands/sparse vegetation%      | 4.77   | 0.00  | 19.00   |
| Water        | %     | Open water%                          | 0.23   | 0.00  | 1.00    |

|                |    |                                                         |         |         |         |
|----------------|----|---------------------------------------------------------|---------|---------|---------|
| Elevation      | m  | Elevation of the sampling site                          | 198.26  | 3.83    | 555.00  |
| Slope          | °  | Slope of the sampling site                              | 3.35    | 0.13    | 24.39   |
| Aspect         | °  | Aspect of the sampling site                             | 180.57  | 2.07    | 354.81  |
| Bio1           | °C | Annual Mean Temperature                                 | 7.44    | 5.19    | 9.00    |
| Bio2           | °C | Mean Diurnal Range                                      | 11.51   | 9.72    | 12.75   |
| Bio3           | -  | Isothermality                                           | 24.65   | 22.28   | 25.80   |
| Bio4           | -  | Temperature Seasonality                                 | 1270.15 | 1200.55 | 1375.42 |
| Bio5           | °C | Max Temperature of Warmest Month                        | 29.26   | 27.50   | 30.50   |
| Bio6           | °C | Min Temperature of Coldest Month                        | -17.44  | -22.00  | -13.30  |
| Bio7           | °C | Temperature Annual Range                                | 46.70   | 43.10   | 51.00   |
| Bio8           | °C | Mean Temperature of Wettest Quarter                     | 22.25   | 20.07   | 23.78   |
| Bio9           | °C | Mean Temperature of Driest Quarter                      | -9.27   | -12.92  | -7.03   |
| Bio10          | °C | Mean Temperature of Warmest Quarter                     | 22.25   | 20.07   | 23.78   |
| Bio11          | °C | Mean Temperature of Coldest Quarter                     | -9.27   | -12.92  | -7.03   |
| Bio12          | mm | Annual Precipitation                                    | 772.15  | 623.00  | 942.00  |
| Bio13          | mm | Precipitation of Wettest Month                          | 203.54  | 167.00  | 250.00  |
| Bio14          | mm | Precipitation of Driest Month                           | 6.70    | 4.00    | 10.00   |
| Bio15          | -  | Precipitation Seasonality                               | 103.51  | 98.37   | 108.11  |
| Bio16          | mm | Precipitation of Wettest Quarter                        | 488.01  | 397.00  | 595.00  |
| Bio17          | mm | Precipitation of Driest Quarter                         | 24.85   | 16.00   | 35.00   |
| Bio18          | mm | Precipitation of Warmest Quarter                        | 488.01  | 397.00  | 595.00  |
| Bio19          | mm | Precipitation of Coldest Quarter                        | 24.85   | 16.00   | 35.00   |
| <b>Spatial</b> |    | <b>Spatial factors</b>                                  |         |         |         |
| MEM1           | -  |                                                         | 0       | -1.208  | 2.133   |
| MEM2           | -  | 43 distance-based Moran's eigenvector maps (MEM1-MEM43) | 0       | -2.306  | 2.012   |
| ...            | -  |                                                         | ...     | ...     | ...     |
| MEM43          | -  |                                                         | 0       | -3.407  | 3.395   |

Variables indicating significant multicollinearity (with variance inflation factor  $\geq 3$ ) are excluded.

For spatial variables, only MEMs with positive eigenvalues are retained as spatial explanatory variables.

**Table S2.** Species list that observed in this study.

| Species name                          |
|---------------------------------------|
| <i>Acanthomysis</i> sp.               |
| <i>Acentrella sibirica</i>            |
| <i>Agriotypus</i> sp.                 |
| <i>Allocosmoecus</i> sp.              |
| <i>Amphinemura</i> sp.                |
| <i>Ampumixis</i> sp.                  |
| <i>Anisogomphus</i> ( <i>maacki</i> ) |
| <i>Anodonta woodiana</i>              |
| <i>Antocha</i> sp.                    |
| <i>Arctopsyche</i> sp.                |
| <i>Argyroneta aquatica</i>            |
| <i>Atherix</i> sp.                    |
| <i>Baetiella japonica</i>             |
| <i>Baetis bicaudatus</i>              |
| <i>Beatis</i> sp.1                    |
| <i>Beatis</i> sp.2                    |
| <i>Beatis thermicus</i>               |
| <i>Bellamyia aeruginosa</i>           |
| <i>Berosus</i> sp.                    |
| <i>Bezzia</i> sp.                     |
| <i>Bithynia fuchsiana</i>             |
| <i>Branchiura sowerbyi</i> Beddard    |
| <i>Caenis</i> sp.                     |
| <i>Carabidae</i>                      |
| <i>Ceratopogoniidae</i> sp.1          |
| <i>Ceratopogoniidae</i> sp.2          |
| <i>Cercion sexlineatum</i>            |
| <i>Cheumatopsyche</i> sp.1            |
| <i>Cheumatopsyche</i> sp.2            |
| <i>Chironominae</i>                   |
| <i>Choroterpes altiocularis</i>       |
| <i>Cincticostella orientalis</i>      |
| <i>Cinygmula</i> sp.                  |
| <i>Clinocera</i> sp.                  |
| <i>Crambidae</i>                      |
| <i>Crocothemis</i> sp.                |
| <i>Davidius moiwanus</i>              |
| <i>Diamesinae</i>                     |
| <i>Dicronota</i> sp.                  |
| <i>Discocerina</i> sp.                |
| <i>Dolichocephala</i>                 |
| <i>Dolichopodidae</i>                 |

---

*Dolichopus* sp.  
*Donacia* sp.  
*Drunella basalis*  
*Drunella trispina*  
*Dugesia* sp.  
*Dytiscidae*  
*Ecdyonurus bajkovae*  
*Ecdyonurus kibunensis*  
*Ecdyonurus* sp.1  
*Ecdyonurus* sp.2  
*Ecdyonurus tobiironis*  
*Ecdyonurus viridis*  
*Ecnonumus* sp.  
*Elmidae*  
*Elophila* sp.1  
*Elophila* sp.2  
*Epeorus latifolium*  
*Ephemera orientalis*  
*Ephemera strigata*  
*Ephemerella atagosana*  
*Ephydra* sp.  
*Ephydridae*  
*Eubasilissa* sp.  
*Eubrianax*  
*Gammarus* sp.  
*Glossosoma altaicum*  
*Glossosoma* sp.  
*Goera japonica*  
*Gyraulus compressus*  
*Gyraulus convexiusculus*  
*Gyretes* sp.  
*Hagenella* sp.  
*Haliphys* sp.  
*Hemerodromia* sp.  
*Hexatoma* sp.  
*Homphylax* sp.  
*Hybomitra montana*  
*Hydatophylax festivus*  
*Hydrobius* sp.  
*Hydrocyphon* sp.  
*Hydrophilidae*  
*Hydrophorus* sp.  
*Hydropsyche kozhantschikovi*  
*Hydropsyche nevae*

---

---

*Hydropsyche orientalis*  
*Hydropsyche* sp.  
*Hydropsyche yaeyamensis*  
*Hydroptila* sp.  
*Isonychia japonica*  
*Isoperla* sp.  
*Lepidostoma* sp.  
*Lethocerus indicus*  
*Leuctuidae*  
*Limnephilidae*  
*Limnephilus* sp.  
*Liodessus* sp.  
*Matrona cornelia*  
*Megrcys ochracea*  
*Molannodes*  
*Nematoda*  
*Neonectes natrrix*  
*Neoperla* sp.  
*Nephelopsis* sp.  
*Nihomogomphus(viridis)*  
*Odontomyia* sp.  
*Oligochaeta*  
*Onychogomphus(viridicostus)*  
*Oreogeton* sp.  
*Oreoleptidae*  
*Orientalis*  
*Ormosia* sp.  
*Orthocladinae*  
*Oyamia* sp.1  
*Oyamia* sp2.  
*Paraleptophlebia japonica*  
*Paraleptophlebia westoni*  
*Parapoynx crisonalis*  
*Perlomyia*  
*Phanocelia*  
*Placobdella* sp.  
*Platycnemis* sp.  
*Potamanthus huoshanensis*  
*Prosimulium daisetsense*  
*Prosimulium* sp.  
*Protohermes grandis*  
*Psilotreta kisoensis*  
*Psychoda* sp.  
*Psychomyia* sp.

---

---

*Radix auricularis*  
*Radix swinhoei*  
*Rhithorogena* sp.  
*Rhyacophila brevicephala*  
*Rhyacophila kawamurae*  
*Rhyacophila nigrocephala*  
*Rhyacophila sibirica*  
*Rhyacophila* sp.1  
*Rhyacophila* sp.2  
*Rhyphium* sp.  
*Scatella* sp.  
*Serratella rufa*  
*Serratella setigera*  
*Setodes turbatus* (Ceraclea)  
*Sieboldius* sp.  
*Simulium japonicum*  
*Simulium* sp.  
*Simulium yonagoense*  
*Siphonurus* sp.  
*Sperchopsis* sp.  
*Stavsolus* sp.  
*Stenopsyche marmorata*  
*Stylurus* sp.  
*Suwallia* sp.  
*Syncaris* sp.  
*Tanyderidae*  
*Tanypodiinae*  
*Tholymis tillarga*  
*Tipula* sp.  
*Tomocerus* sp.  
*Unio douglasiae*  
*Whitmania pigra* Whitman

---

*Carabidae*, *Ceratopogoniidae*, *Crambidae*, *Dolichopodidae*, *Dytiscidae*, *Elmidae*, *Ephydriidae*, *Hydrophilidae*, *Leuctuidae*, *Limnephilidae*, *Molannodes*, *Oreoleptidae* and *Tanyderidae* were identified to family level; *Nematoda* and *Oligochaeta* were only identified to class level.

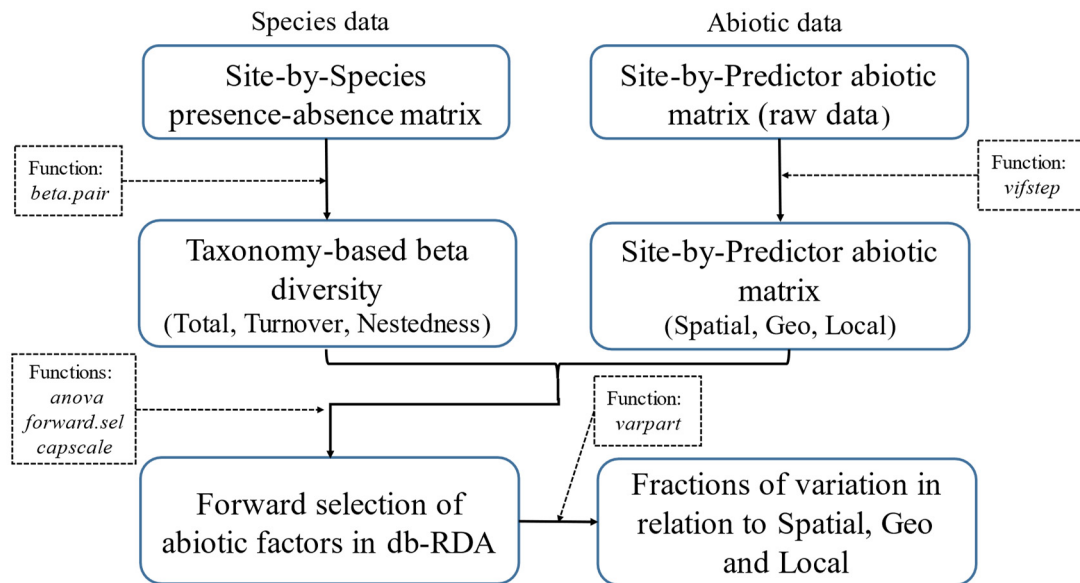

**Figure S1.** A flow-chart of taxonomic  $\beta$ -diversity analyses.

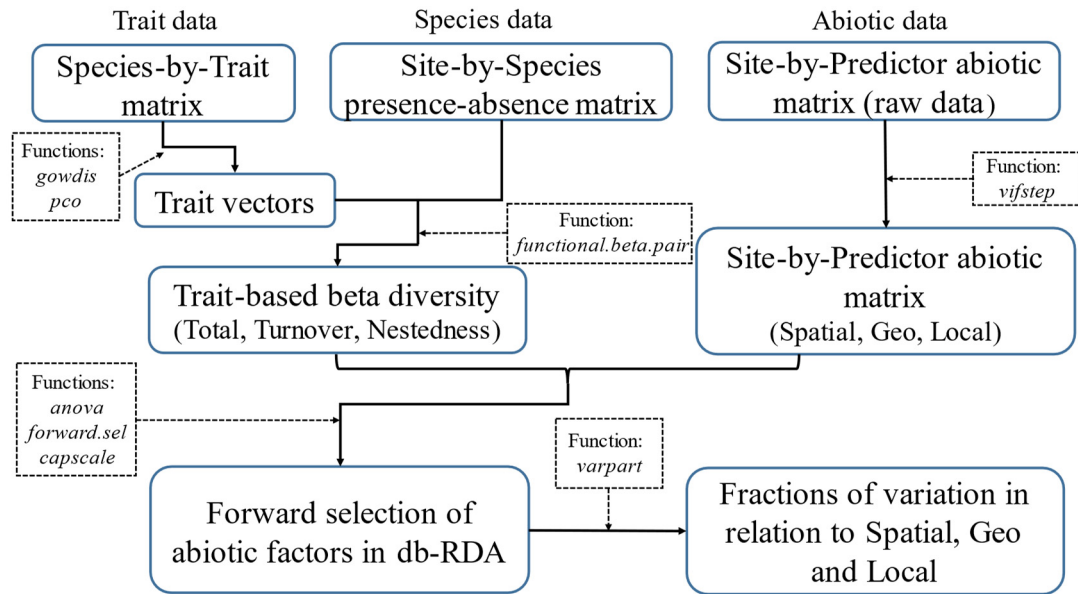

**Figure S2.** A flow-chart of functional  $\beta$ -diversity analyses.



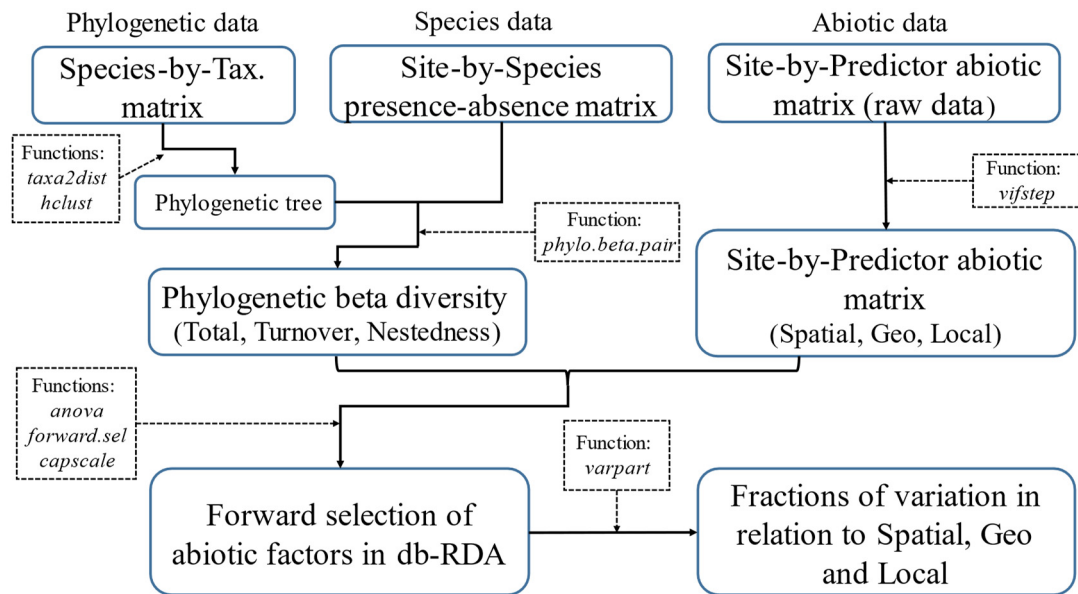

**Figure S3.** A flow-chart of phylogenetic  $\beta$ -diversity analyses.
